# Supplementary material for: Wet-adhesive γ-PGA/ε-PLL hydrogel loaded with EGF for tracheal epithelial injury repair
Source: Royal Society of Chemistry journal article supplement (doi:10.1039/d3tb01550e), 2023-01-01
Supplement: d3tb01550e1.pdf [file d3tb01550e1.pdf]

## Supplementary material

### Wet-adhesive $\gamma$ -PGA/ $\epsilon$ -PLL Hydrogel Loaded with EGF for Tracheal Epithelial Injury Repair

Chuang Hu <sup>a,1</sup>, Haoran Ji <sup>a,1</sup>, Yan Gong <sup>a</sup>, Xuhui Yang <sup>a</sup>, Yunxuan Jia <sup>b</sup>, Yuanhao Liu <sup>a</sup>, Guangyu Ji <sup>a,\*</sup>, Xiansong Wang <sup>a,\*</sup>, and Mingsong Wang <sup>a,\*</sup>

<sup>a</sup> Department of Thoracic Surgery, Shanghai Key Laboratory of Tissue Engineering, Shanghai Ninth People's Hospital, Shanghai Jiao Tong University School of Medicine, Shanghai 200001, China

<sup>b</sup> Shanghai Chest Hospital, Shanghai Jiao Tong University School of Medicine, Shanghai 200001, China

<sup>1</sup> These authors contributed equally.

\* Corresponding author. Department of Thoracic Surgery, Shanghai Key Laboratory of Tissue Engineering, Shanghai Ninth People's Hospital, Shanghai Jiao Tong University School of Medicine, Shanghai, 200001, China

E-mail addresses: [jigy\\_dor@163.com](mailto:jigy_dor@163.com) (G. Ji); [vincentuis@shsmu.edu.cn](mailto:vincentuis@shsmu.edu.cn) (X. Wang); [wms0210@163.com](mailto:wms0210@163.com) (M. Wang)

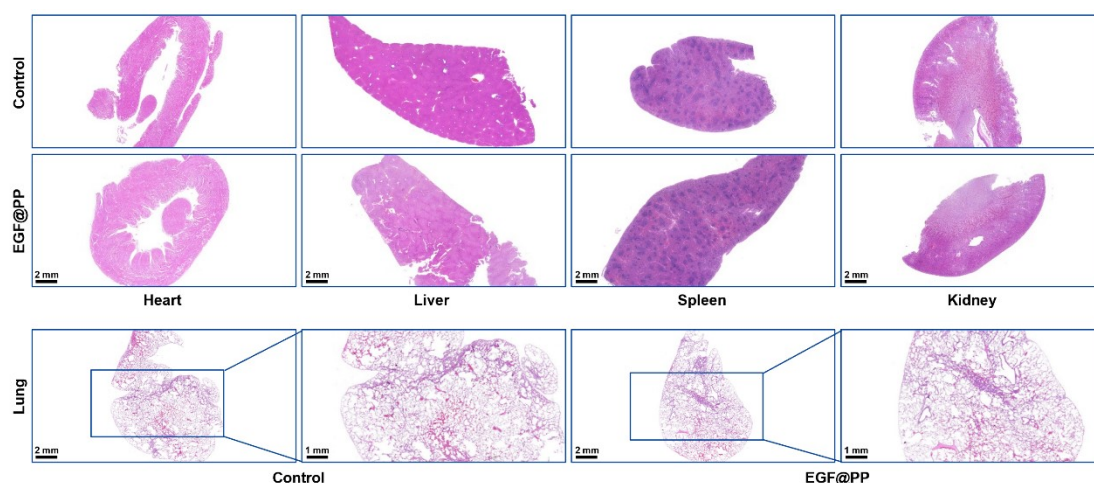

**Figure S1.** H&E-stained images of various tissues (heart, liver, spleen, lung, and kidney tissues) from the control and EGF@PP groups at day 10.
